# Supplementary material for: Villin headpiece unfolding upon binding to boridene mediated by the “anchoring-perturbation” mechanism
Source: PubMed Central journal article supplement — iScience. 2023 Nov 30;27(1):108577. doi: 10.1016/j.isci.2023.108577 (PMC10758975; doi:10.1016/j.isci.2023.108577), 2023-11-30
Supplement: mmc1.pdf [file mmc1.pdf]

**iScience, Volume 27**

**Supplemental information**

**Villin headpiece unfolding upon binding  
to boridene mediated  
by the “anchoring-perturbation” mechanism**

**Yuqi Luo, Zonglin Gu, Weihua Liao, Yiwen Huang, Jose Manuel Perez-Aguilar, Yanbo Luo, and Longzhen Chen**

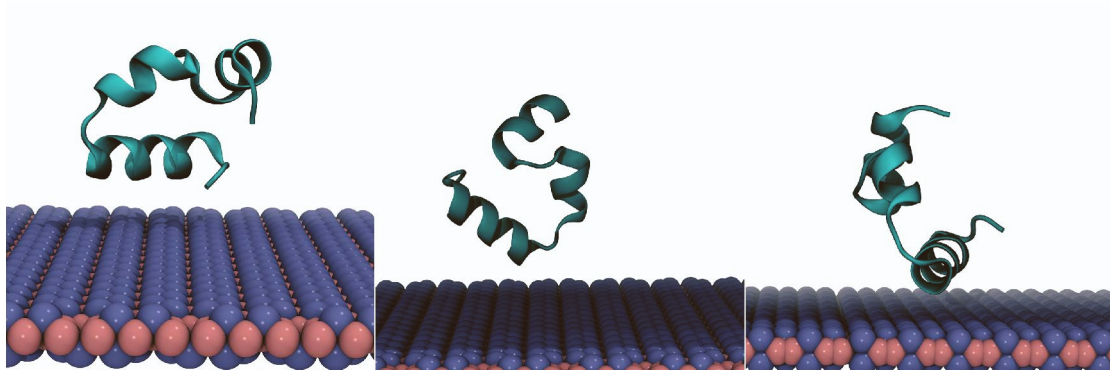

Figure S1. The final conformations of HP35 binding to boridene nanosheet at 2000 ns in three parallel simulations of sys-3. Related to Figure 1.

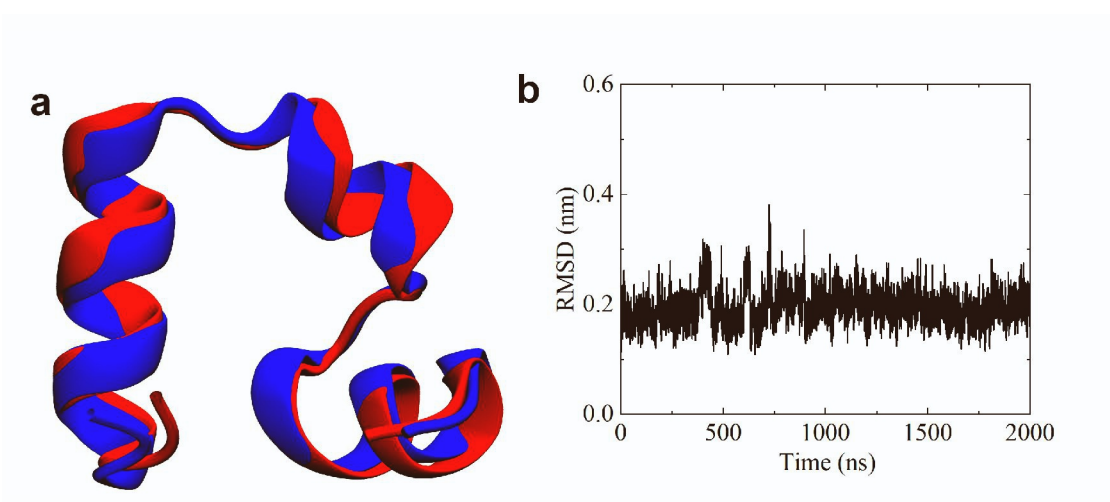

Figure S2. Simulation of an individual HP35 in absence of boridene. (a) Original (red) and final (blue) conformations of HP35 during a 2000-ns simulation. (b) RMSD of HP35 during the simulation. Related to Figure 1.

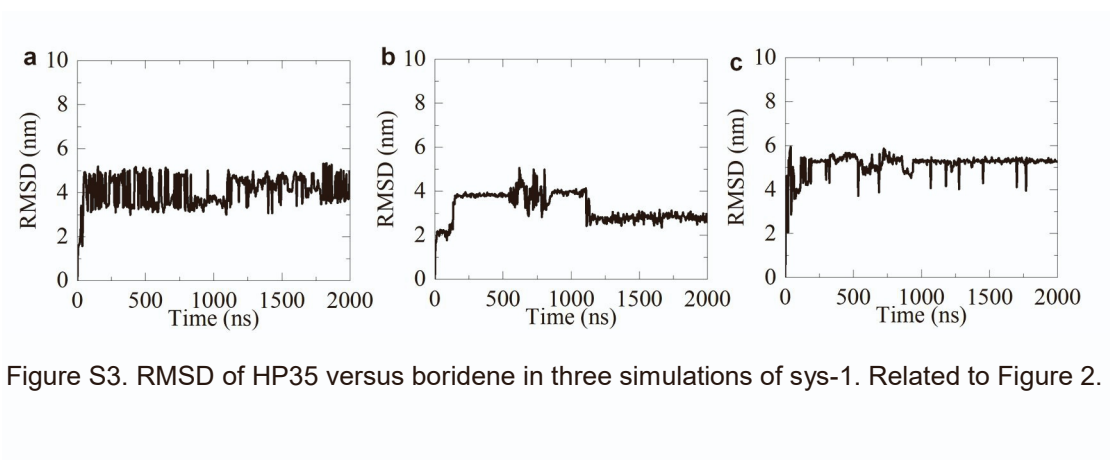

Figure S3. RMSD of HP35 versus boridene in three simulations of sys-1. Related to Figure 2.

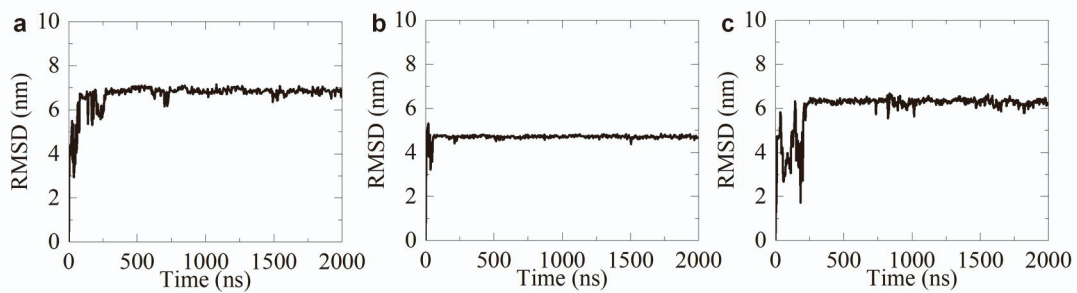

Figure S4. RMSD of HP35 versus boridene in three simulations of sys-2. Related to Figure 2.

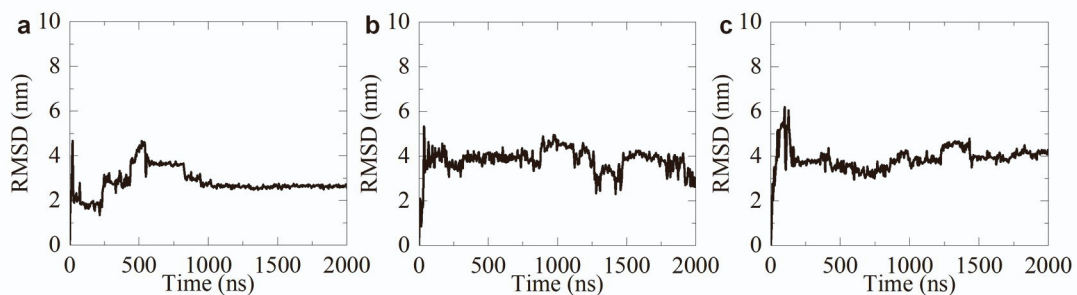

Figure S5. RMSD of HP35 versus boridene in three simulations of sys-3. Related to Figure 2.

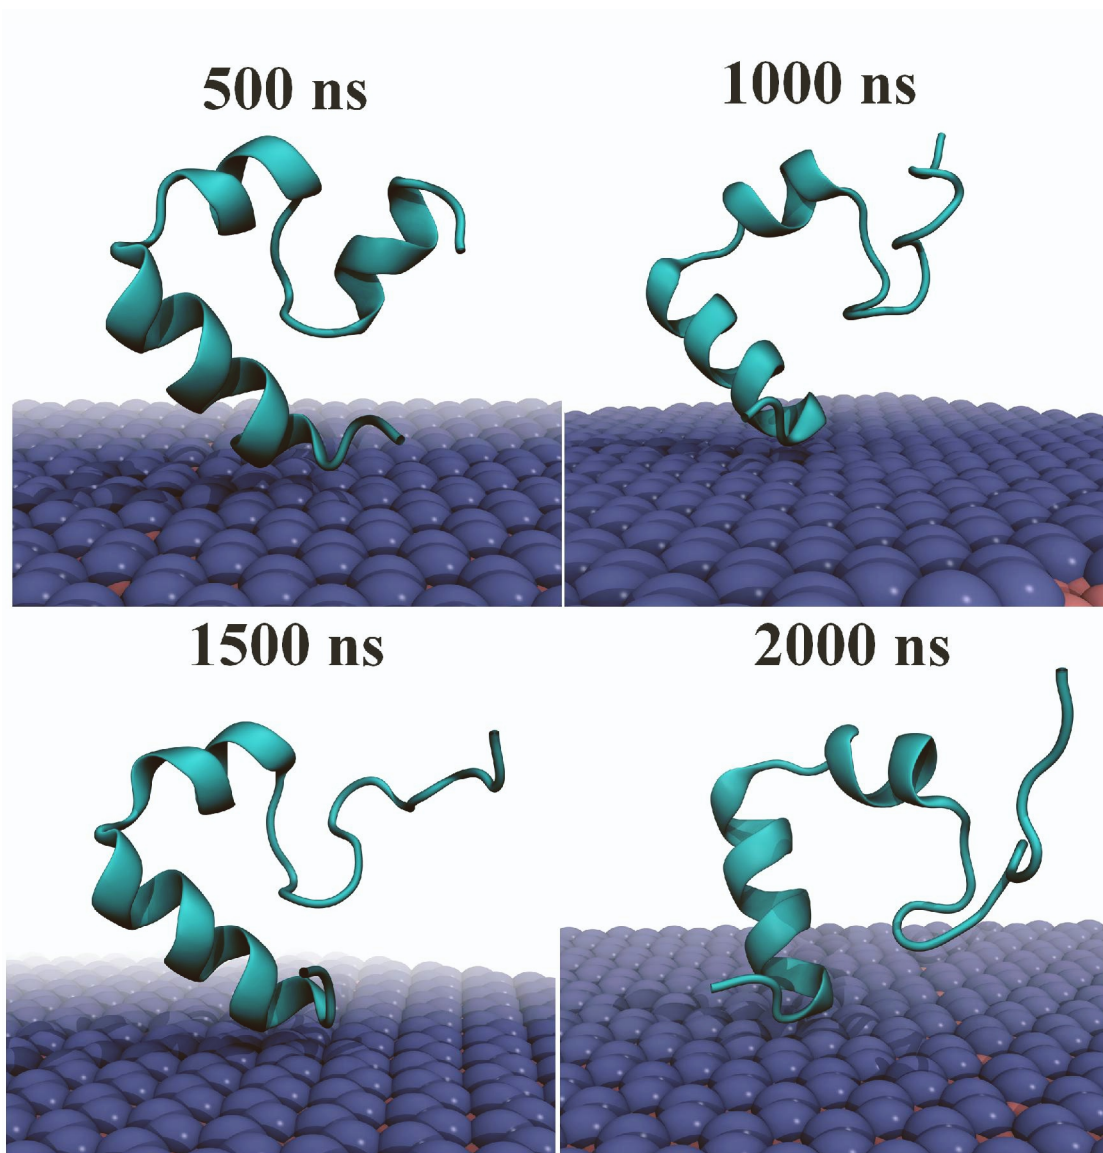

Figure S6. Snapshots of HP35 on boridene at four time points in the first simulation of sys-1.

Related to Figure 2.

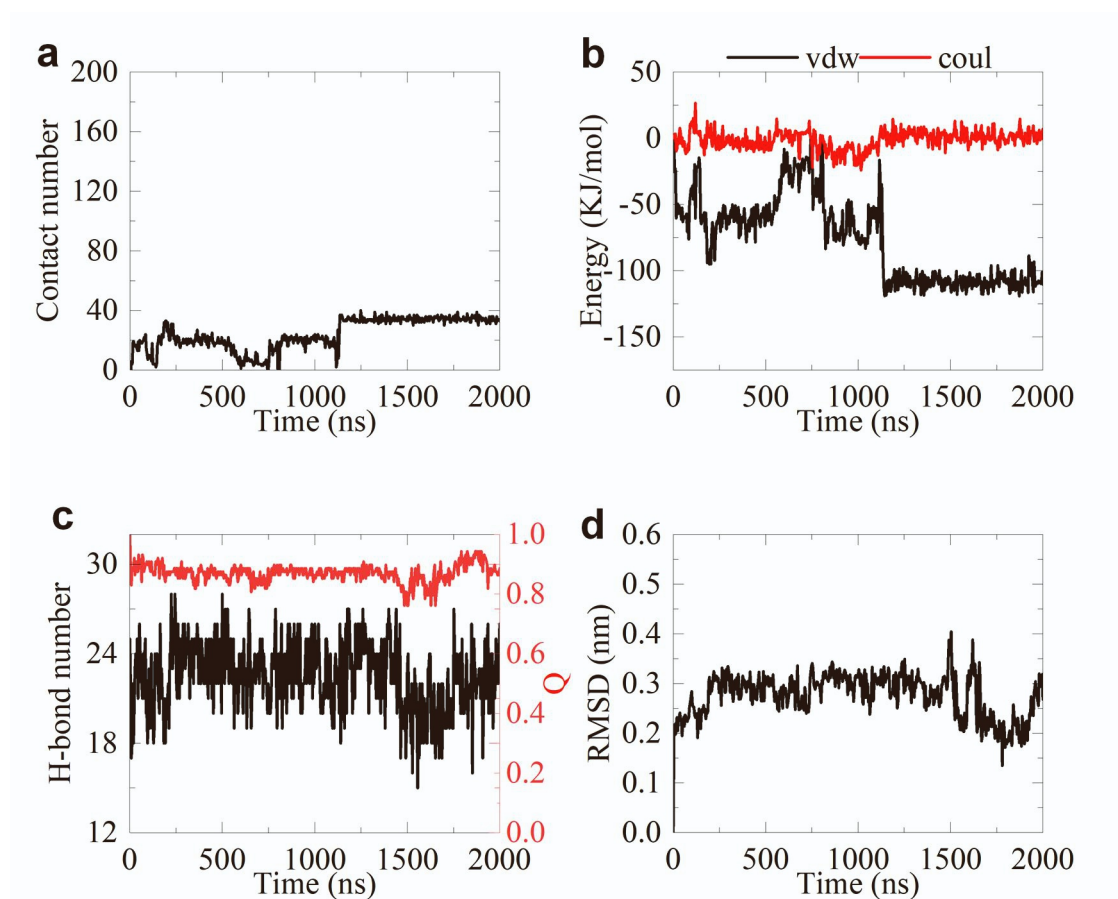

Figure S7. Binding kinetics of HP35 to boridene nanosheet in the second trajectory of sys-1 simulations. (a) Atom contact number of HP35 to boridene. (b) Interaction energies, including van der Waals (vdW) and Coulomb (Coul) energies, between HP35 and boridene. (c) Hydrogen bond (H-bond) number and Q value evolutions of HP35. (d) Root-mean-square displacement (RMSD) of HP35. Related to Figure 2.

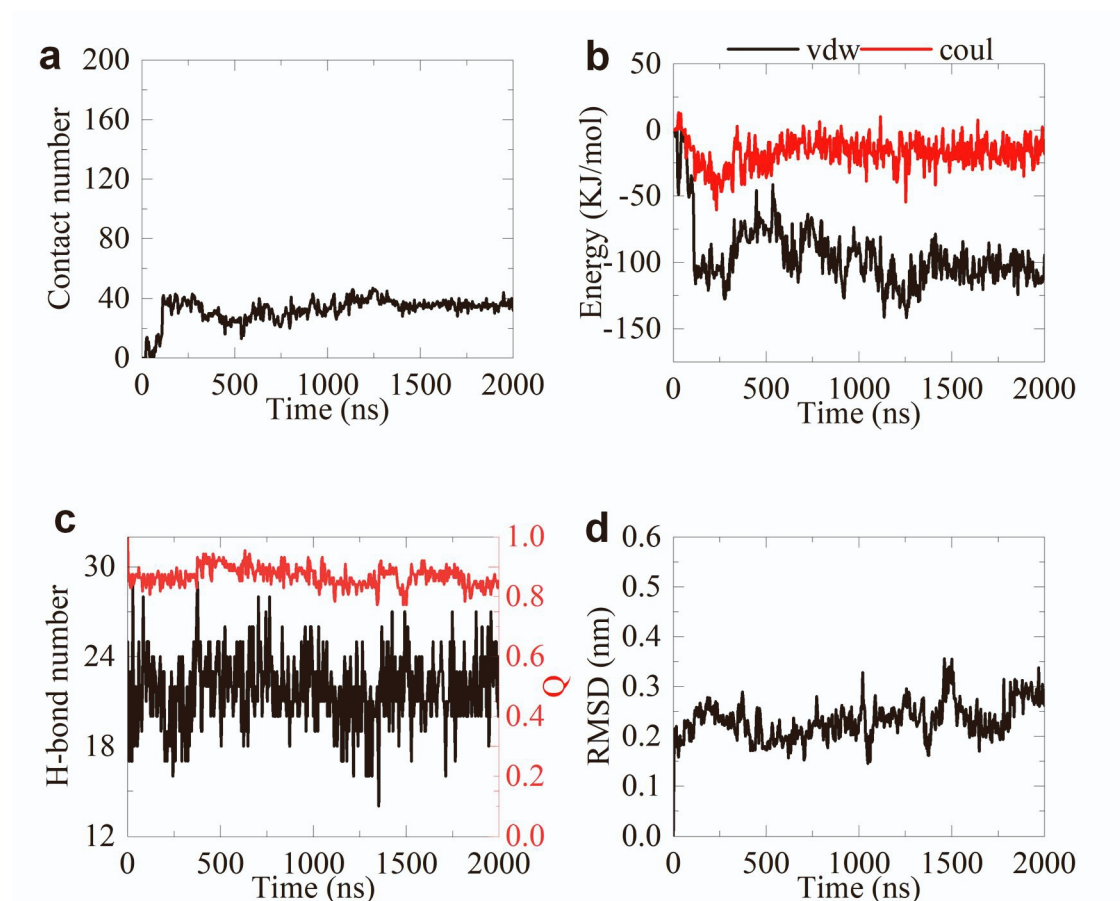

Figure S8. Binding kinetics of HP35 to boridene nanosheet in the third trajectory of sys-1 simulations. (a) Atom contact number of HP35 to boridene. (b) Interaction energies, including van der Waals (vdW) and Coulomb (Coul) energies, between HP35 and boridene. (c) Hydrogen bond (H-bond) number and Q value evolutions of HP35. (d) Root-mean-square displacement (RMSD) of HP35. Related to Figure 2.

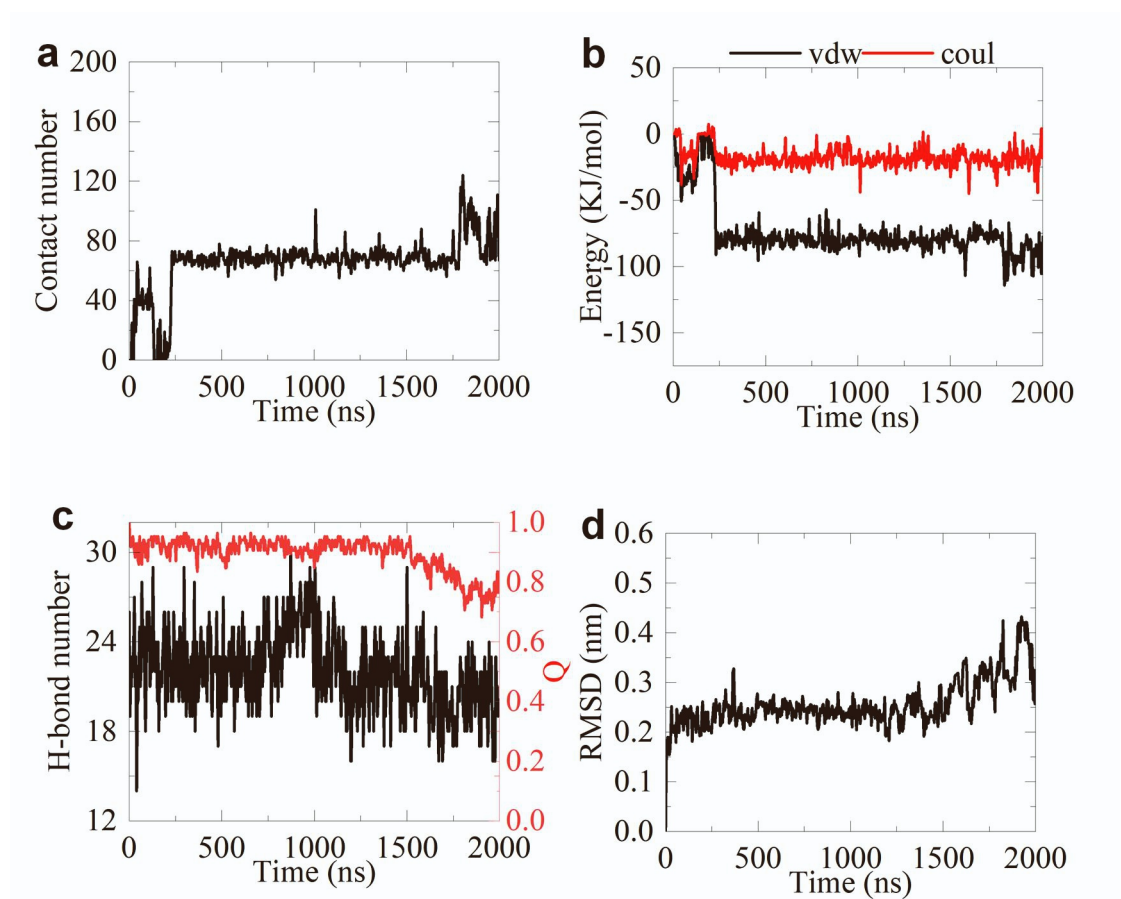

Figure S9. Binding kinetics of HP35 to boridene nanosheet in the first trajectory of sys-2 simulations. (a) Atom contact number of HP35 to boridene. (b) Interaction energies, including van der Waals (vdW) and Coulomb (Coul) energies, between HP35 and boridene. (c) Hydrogen bond (H-bond) number and Q value evolutions of HP35. (d) Root-mean-square displacement (RMSD) of HP35. Related to Figure 2.

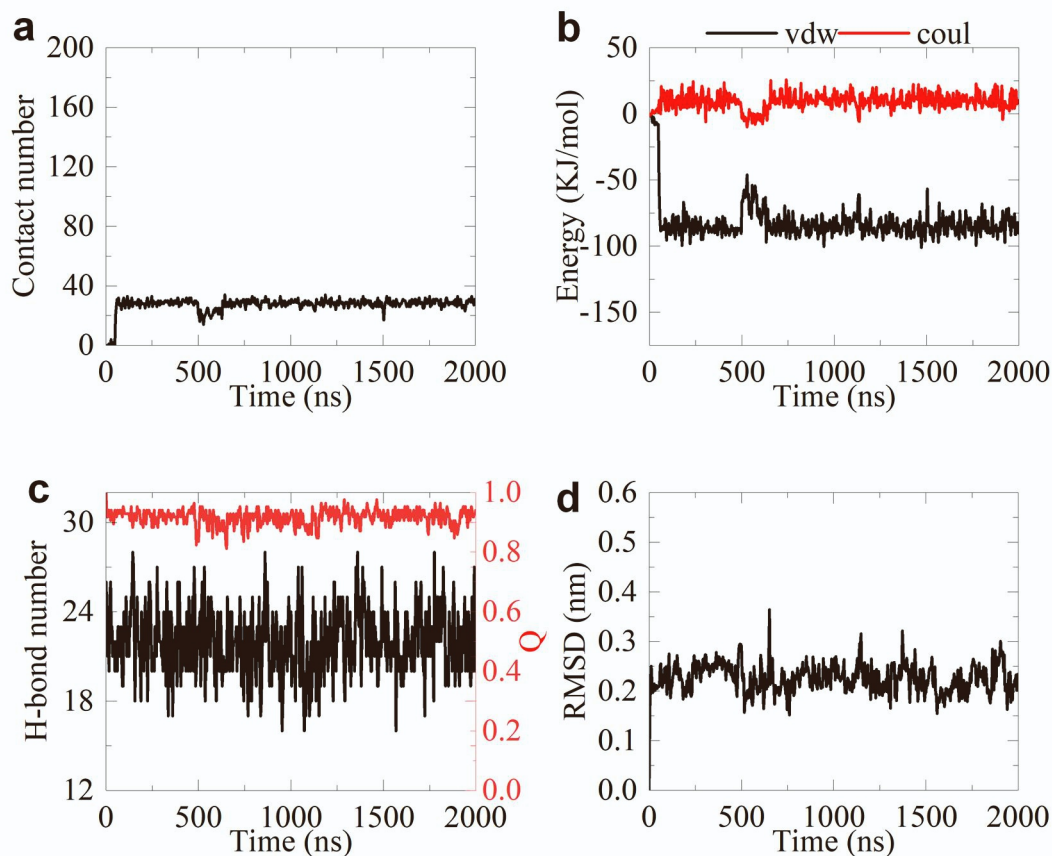

Figure S10. Binding kinetics of HP35 to boridene nanosheet in the second trajectory of sys-2 simulations. (a) Atom contact number of HP35 to boridene. (b) Interaction energies, including van der Waals (vdW) and Coulomb (Coul) energies, between HP35 and boridene. (c) Hydrogen bond (H-bond) number and Q value evolutions of HP35. (d) Root-mean-square displacement (RMSD) of HP35. Related to Figure 2.



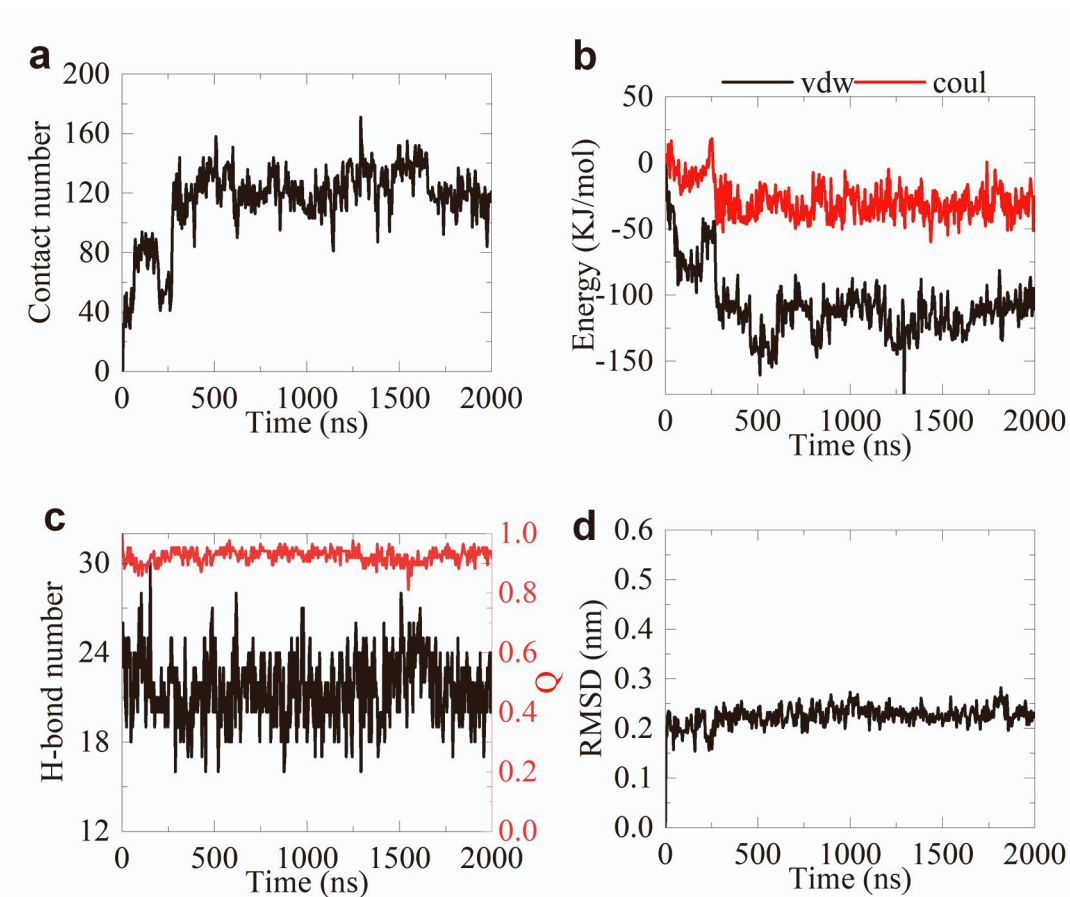

Figure S11. Binding kinetics of HP35 to boridene nanosheet in the third trajectory of sys-2 simulations. (a) Atom contact number of HP35 to boridene. (b) Interaction energies, including van der Waals (vdW) and Coulomb (Coul) energies, between HP35 and boridene. (c) Hydrogen bond (H-bond) number and Q value evolutions of HP35. (d) Root-mean-square displacement (RMSD) of HP35. Related to Figure 2.

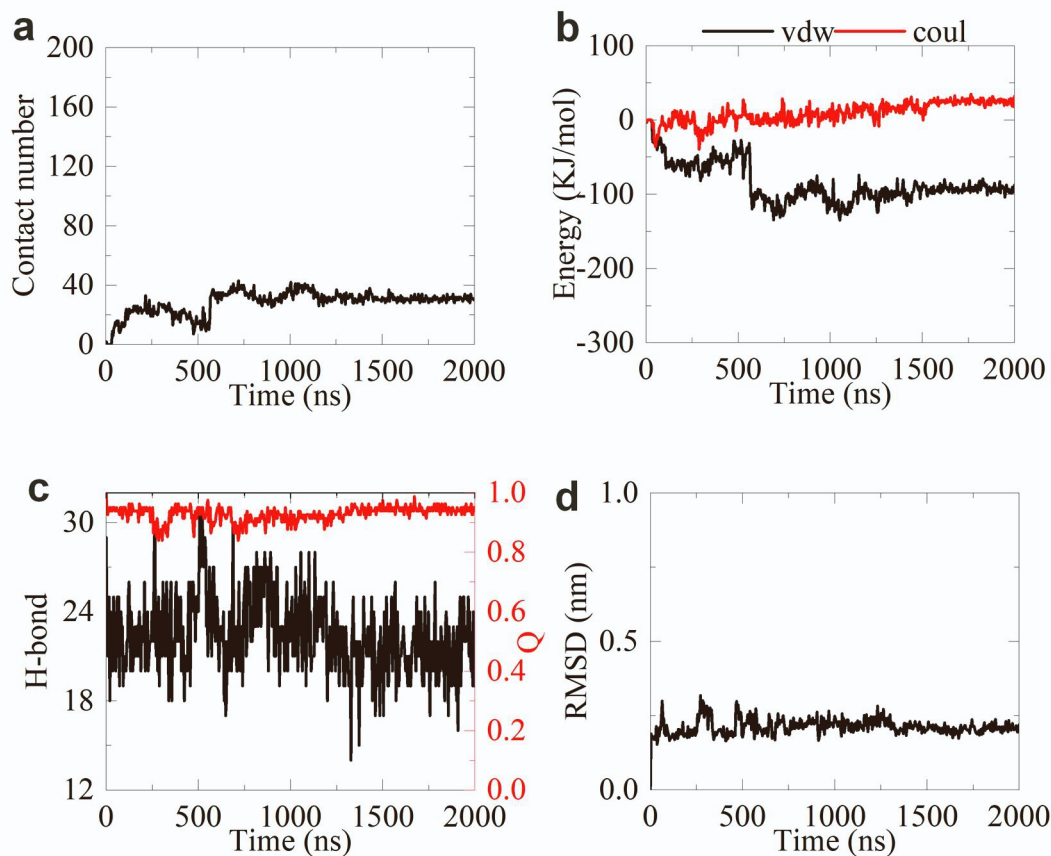

Figure S12. Binding kinetics of HP35 to boridene nanosheet in the first trajectory of sys-3 simulations. (a) Atom contact number of HP35 to boridene. (b) Interaction energies, including van der Waals (vdW) and Coulomb (Coul) energies, between HP35 and boridene. (c) Hydrogen bond (H-bond) number and Q value evolutions of HP35. (d) Root-mean-square displacement (RMSD) of HP35. Related to Figure 2.

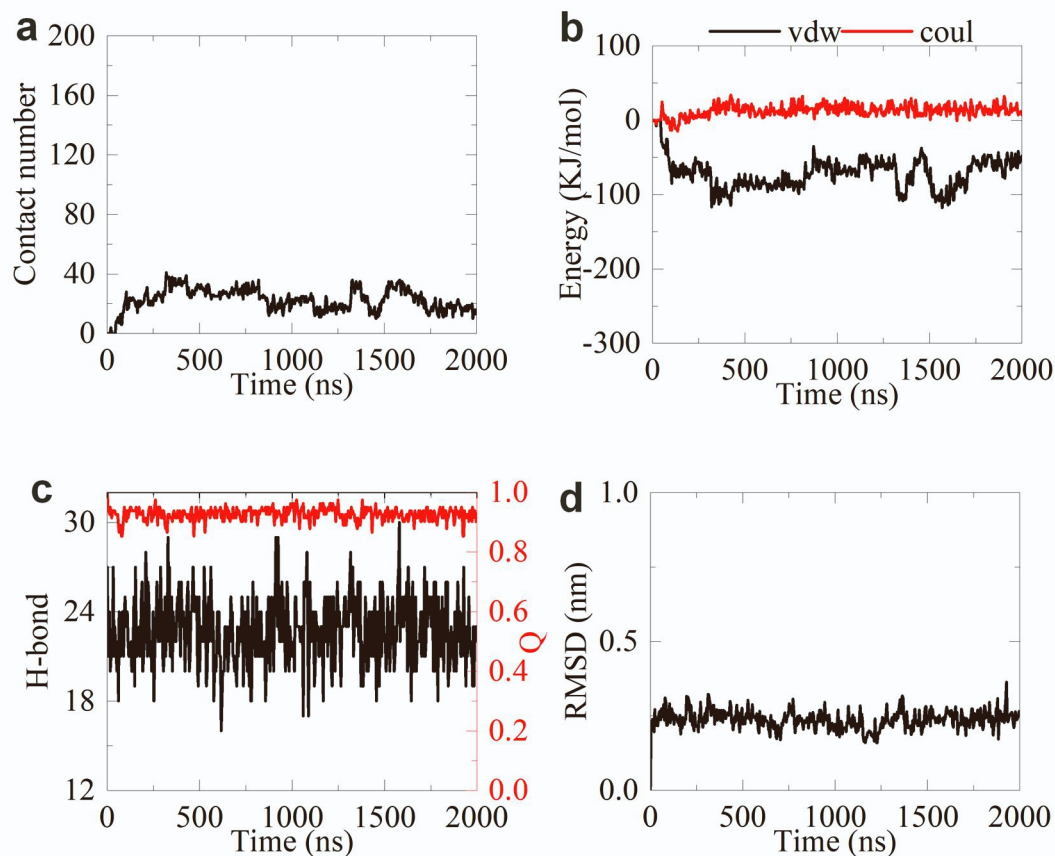

Figure S13. Binding kinetics of HP35 to boridene nanosheet in the second trajectory of sys-3 simulations. (a) Atom contact number of HP35 to boridene. (b) Interaction energies, including van der Waals (vdW) and Coulomb (Coul) energies, between HP35 and boridene. (c) Hydrogen bond (H-bond) number and Q value evolutions of HP35. (d) Root-mean-square displacement (RMSD) of HP35. Related to Figure 2.

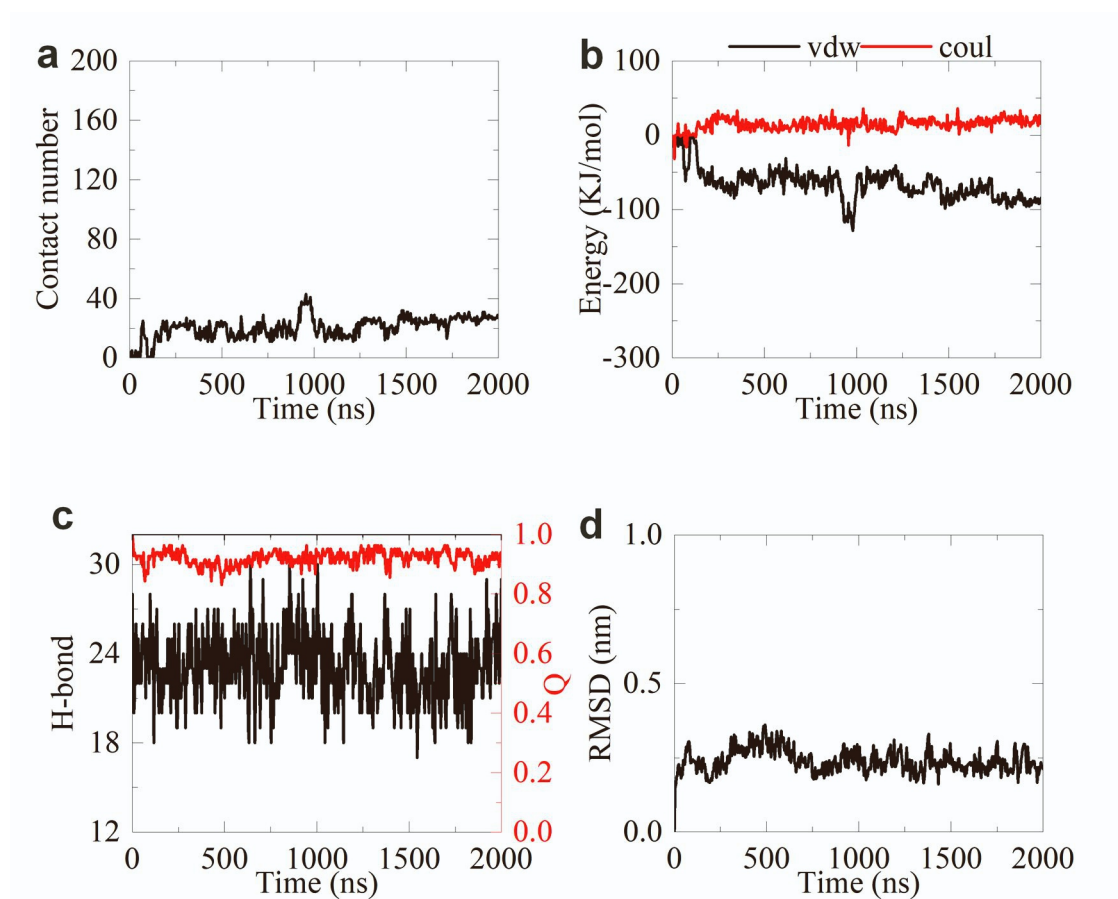

Figure S14. Binding kinetics of HP35 to boridene nanosheet in the third trajectory of sys-3 simulations. (a) Atom contact number of HP35 to boridene. (b) Interaction energies, including van der Waals (vdW) and Coulomb (Coul) energies, between HP35 and boridene. (c) Hydrogen bond (H-bond) number and Q value evolutions of HP35. (d) Root-mean-square displacement (RMSD) of HP35. Related to Figure 2.

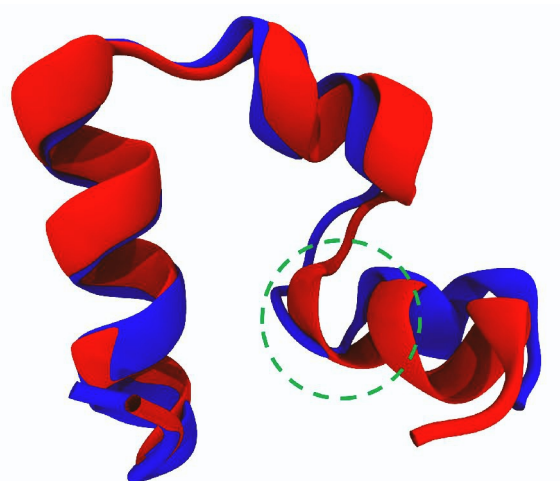

Figure S15. Unwinding region of HP35 in the first trajectory of sys-2 simulation. Red: Initial

HP35 structure; Blue: final HP35 structure. Green dashed circle indicates the local unwinding region.

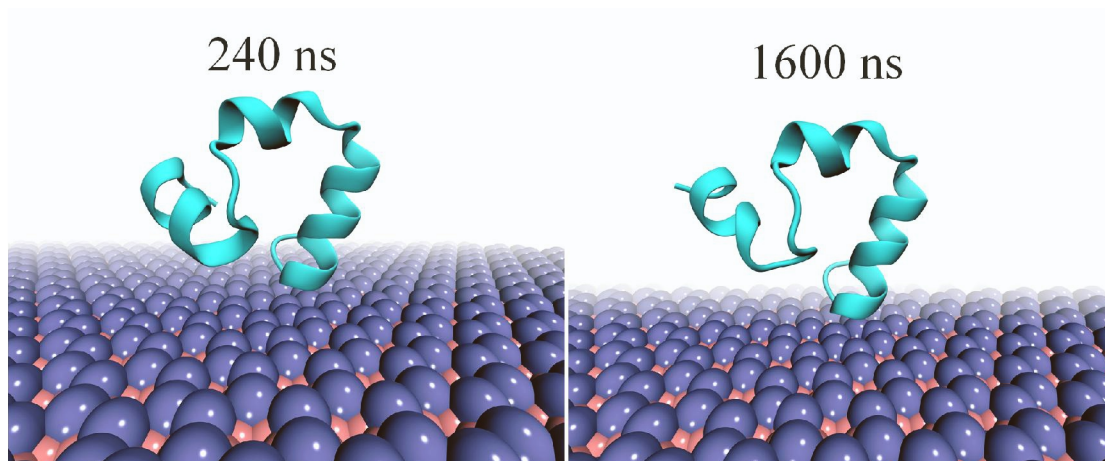

Figure S16. Snapshots showing the unfolding of HP35 on boridene in the first trajectory of sys-2 simulations. Related to Figure 2.

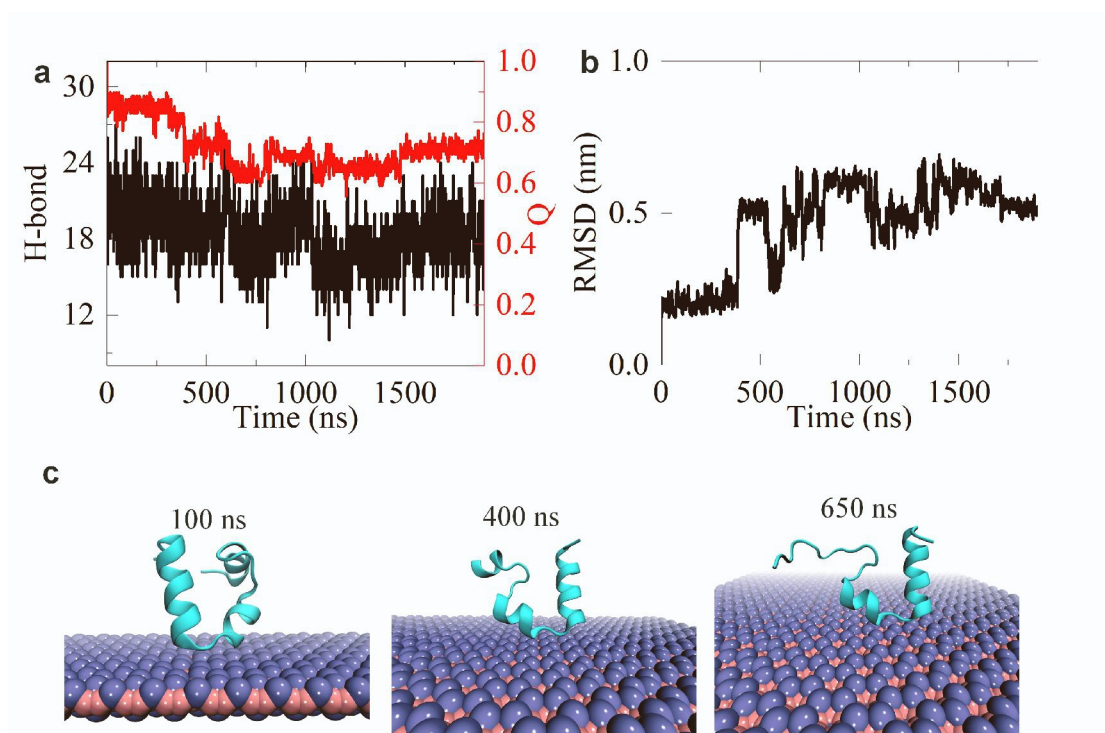

Figure S17. Unfolding of HP35 in an additional simulation of sys-1. (a) Hydrogen bond (H-bond) number and Q value evolutions of HP35. (b) Root-mean-square displacement (RMSD) of HP35.

(c) Three typical snapshots showing the unfolding process. Related to Figure 2.

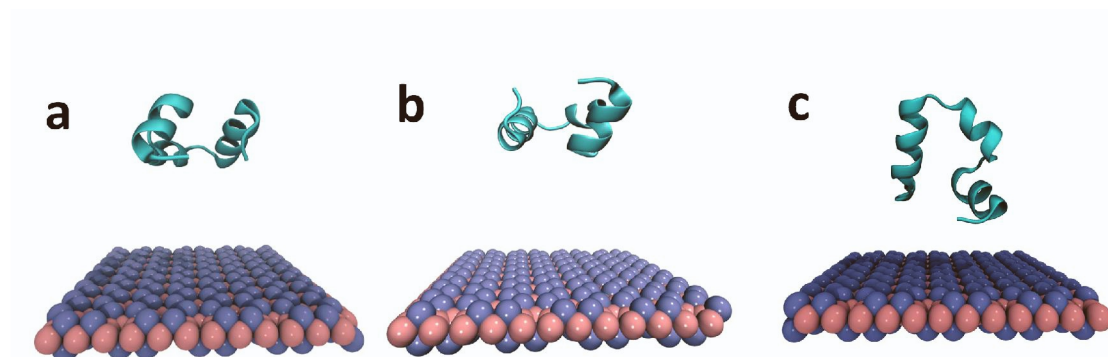

Figure S18. Initial conformations. In these three conformations, the HP35 rotates for  $0^\circ$  (a),  $180^\circ$  (b) and  $270^\circ$  (c) aiming at achieving the different initial structure, wherein HP35 faces to boridene with different surfaces. Related to STAR Methods.

Table S1. Simulation details of each system. Related to STAR Methods.

|              | box size (nm <sup>3</sup> ) | water number | Na <sup>+</sup> number | Cl <sup>-</sup> number |
|--------------|-----------------------------|--------------|------------------------|------------------------|
| <b>sys-1</b> | 3.5×4.2×6                   | 2372         | 8                      | 10                     |
| <b>sys-2</b> | 3.5×4.2×6                   | 2377         | 8                      | 10                     |
| <b>sys-3</b> | 3.5×4.2×6                   | 2465         | 8                      | 10                     |

Table S2. Force field parameters of boridene. Related to STAR Methods.

|                   | $\sigma$ (nm) | $\epsilon$ (kJ/mol) | charge (e) |
|-------------------|---------------|---------------------|------------|
| <b>molybdenum</b> | 0.415         | 0.7                 | 0.405      |
| <b>boron</b>      | 0.24          | 0.5                 | -0.27      |

Table S3. Optimized coordinates of boridene segment. Related to STAR Methods.

|        |       |       |        |       |       |       |       |      |      |   |
|--------|-------|-------|--------|-------|-------|-------|-------|------|------|---|
| CRYST1 | 5.176 | 8.964 | 17.697 | 89.39 | 90.31 | 90.00 | P 1   | 1    |      |   |
| ATOM   | 1     | B1    | MOL X  | 2     | 2.839 | 1.995 | 8.210 | 1.00 | 0.01 | B |
| ATOM   | 2     | B2    | MOL X  | 2     | 1.972 | 0.494 | 8.206 | 1.00 | 0.01 | B |
| ATOM   | 3     | B3    | MOL X  | 2     | 2.824 | 7.978 | 8.214 | 1.00 | 0.01 | B |

|      |    |     |       |   |       |       |       |      |      |    |
|------|----|-----|-------|---|-------|-------|-------|------|------|----|
| ATOM | 4  | B4  | MOL X | 2 | 1.958 | 6.477 | 8.210 | 1.00 | 0.01 | B  |
| ATOM | 5  | B5  | MOL X | 2 | 0.251 | 6.477 | 8.210 | 1.00 | 0.01 | B  |
| ATOM | 6  | B6  | MOL X | 2 | 4.560 | 4.976 | 8.207 | 1.00 | 0.01 | B  |
| ATOM | 7  | B7  | MOL X | 2 | 0.236 | 3.496 | 8.214 | 1.00 | 0.01 | B  |
| ATOM | 8  | B8  | MOL X | 2 | 2.824 | 4.976 | 8.206 | 1.00 | 0.01 | B  |
| ATOM | 9  | B9  | MOL X | 2 | 1.973 | 3.496 | 8.212 | 1.00 | 0.01 | B  |
| ATOM | 10 | B10 | MOL X | 2 | 0.237 | 0.494 | 8.205 | 1.00 | 0.01 | B  |
| ATOM | 11 | B11 | MOL X | 2 | 4.560 | 7.978 | 8.212 | 1.00 | 0.01 | B  |
| ATOM | 12 | B12 | MOL X | 2 | 4.546 | 1.994 | 8.210 | 1.00 | 0.01 | B  |
| ATOM | 13 | Mo1 | MOL X | 2 | 3.692 | 6.466 | 9.653 | 1.00 | 0.01 | MO |
| ATOM | 14 | Mo2 | MOL X | 2 | 1.104 | 2.007 | 6.766 | 1.00 | 0.01 | MO |
| ATOM | 15 | Mo3 | MOL X | 2 | 3.692 | 3.494 | 9.616 | 1.00 | 0.01 | MO |
| ATOM | 16 | Mo4 | MOL X | 2 | 1.104 | 4.978 | 6.804 | 1.00 | 0.01 | MO |
| ATOM | 17 | Mo5 | MOL X | 2 | 1.104 | 1.984 | 9.653 | 1.00 | 0.01 | MO |
| ATOM | 18 | Mo6 | MOL X | 2 | 3.692 | 6.488 | 6.766 | 1.00 | 0.01 | MO |
| ATOM | 19 | Mo7 | MOL X | 2 | 1.104 | 7.976 | 9.615 | 1.00 | 0.01 | MO |
| ATOM | 20 | Mo8 | MOL X | 2 | 3.692 | 0.495 | 6.803 | 1.00 | 0.01 | MO |

END
